# Supplementary material for: Highly stretchable and sensitive strain sensors with ginkgo-like sandwich architectures
Source: Royal Society of Chemistry journal article supplement (doi:10.1039/d1na00817j), 2022-01-01
Supplement: d1na00817j1.pdf [file d1na00817j1.pdf]

# Highly Stretchable and Sensitive Strain Sensors with Ginkgo-Like Sandwiched Architectures

## Supplementary Information

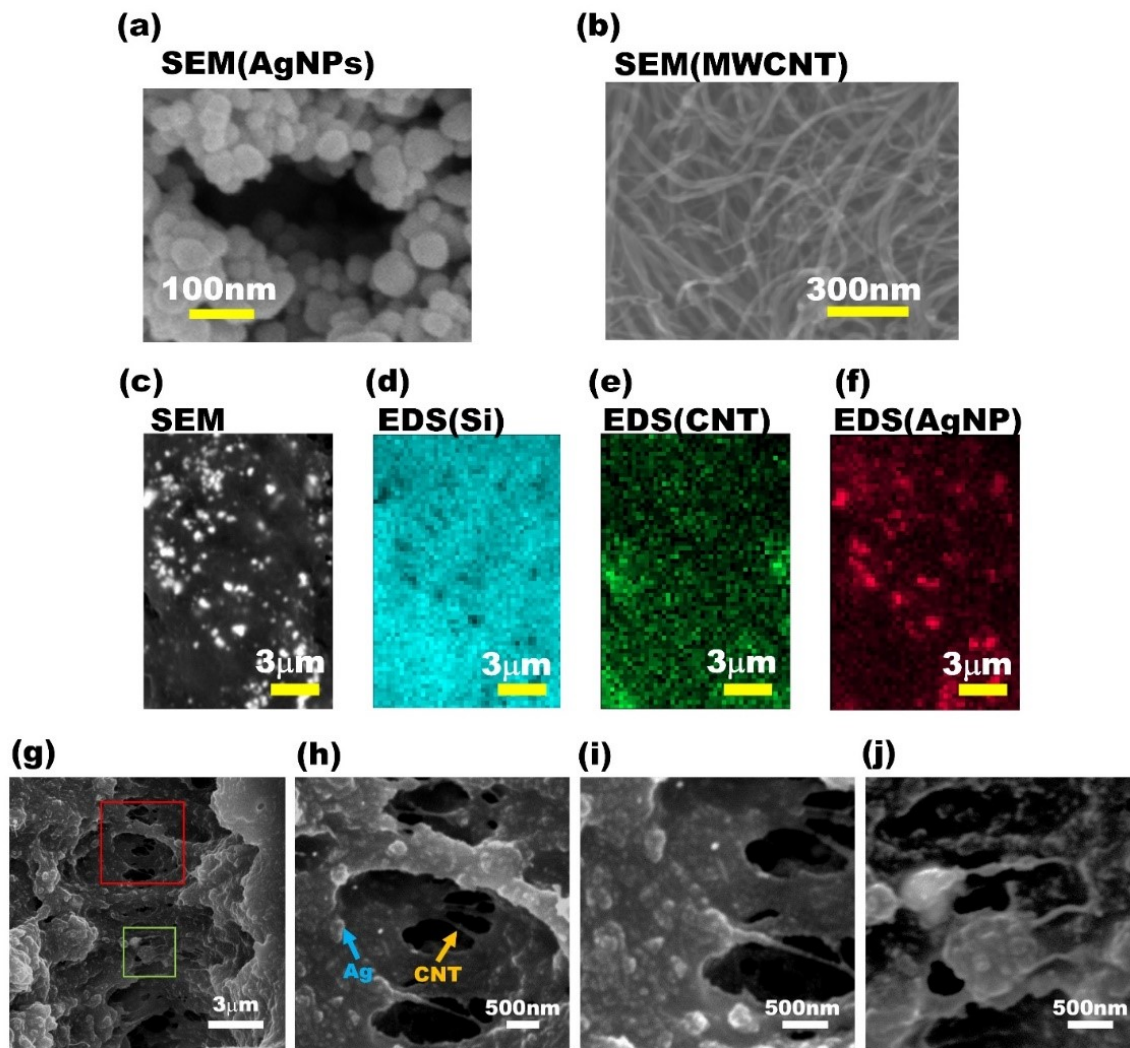

**Figure.S1** SEM images. (a) Ag nanoparticles. (b) Multi-wall carbon nanotubes. (c) Nanocomposites and the EDS maps of (d) Si, (e) MWCNT and (f) Ag NPs. (g) SEM image of the schismatic area of the nanocomposites. (h)(i) A larger view of the red box in (g). (j) A larger view of the green box in (g).

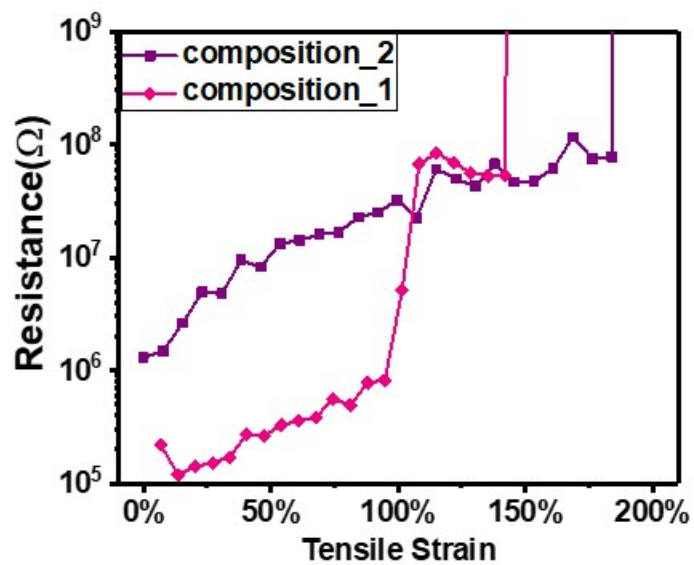

Figure.S2. Influence of composition on material properties.

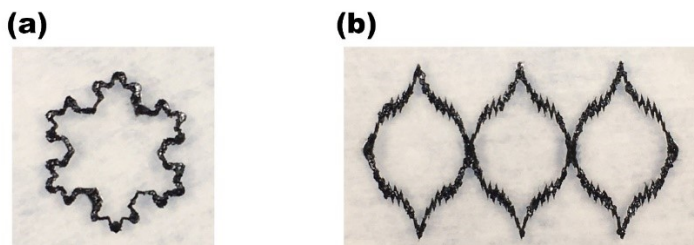

Figure.S3 Optical photos of samples with fractal pattern.(a) Koch curves. (b) Fold-Rhombus pattern.

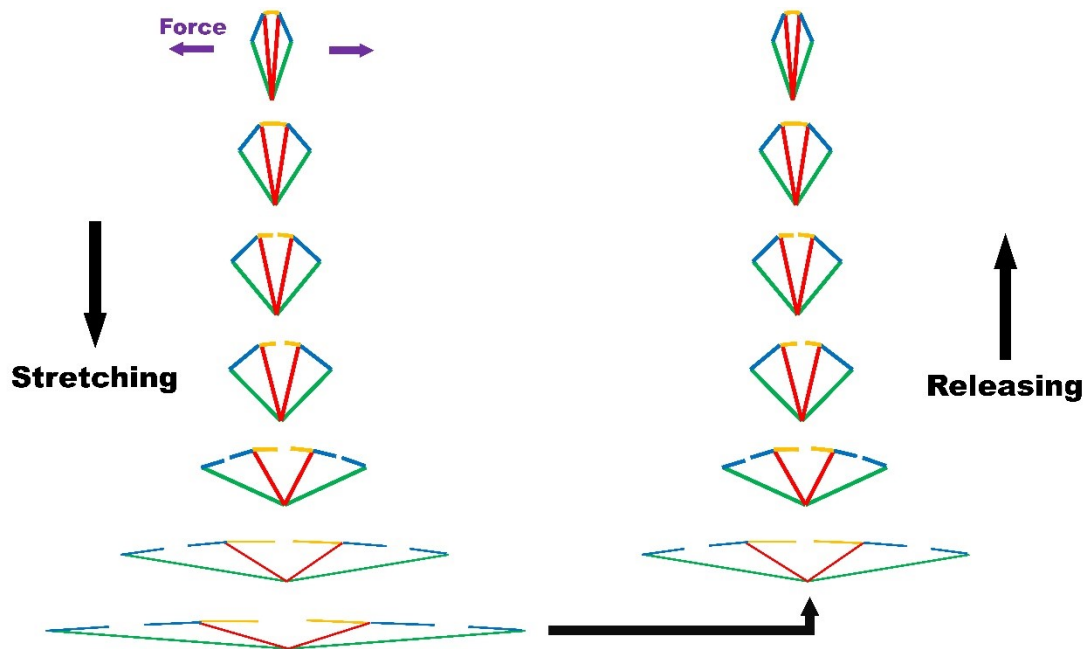

Figure.S4 Evolution of ginkgo-like patterns during stretching and releasing.

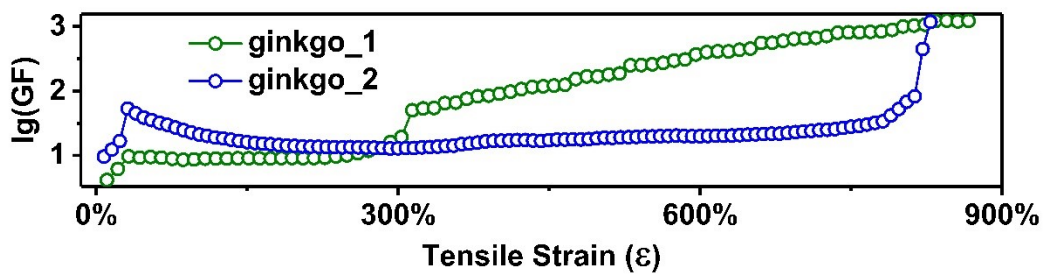

Figure.S5. Logarithmic sensitivity.

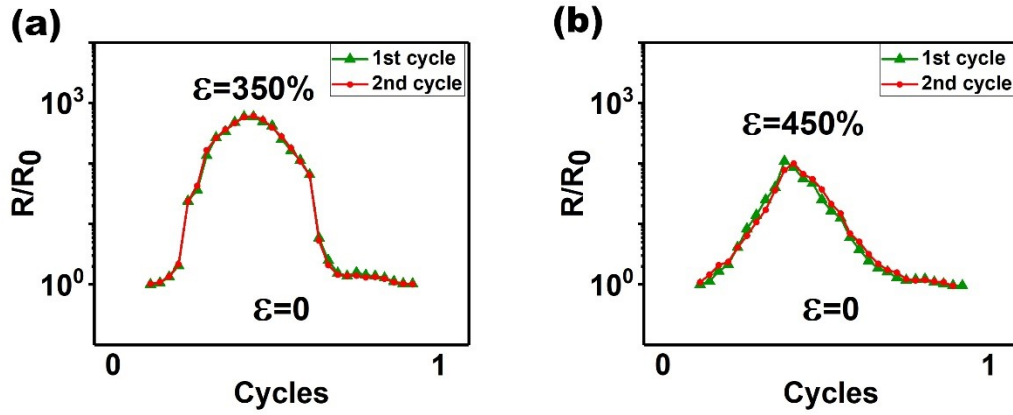

Fig.S6. The coincidence degree and error of different stretching cycles.

(a) 32° and 500% strain

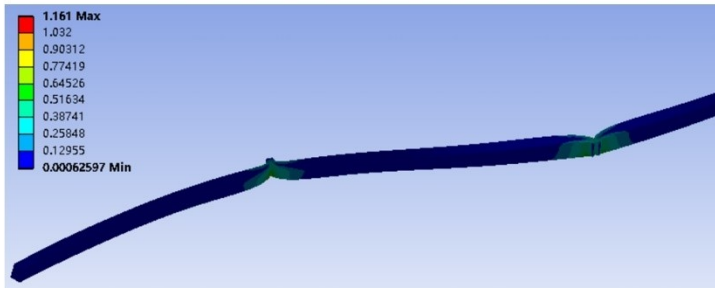

(b) 48° and 270% strain

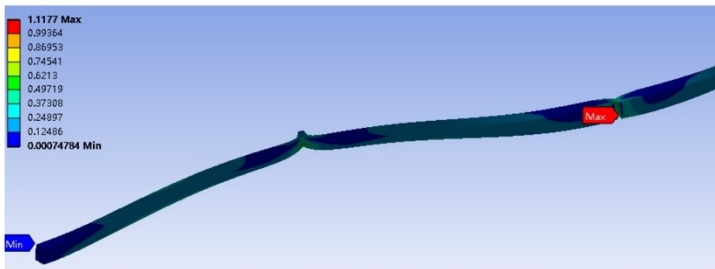

Fig.S7. ANSYS simulation of 32° and 48° folding.

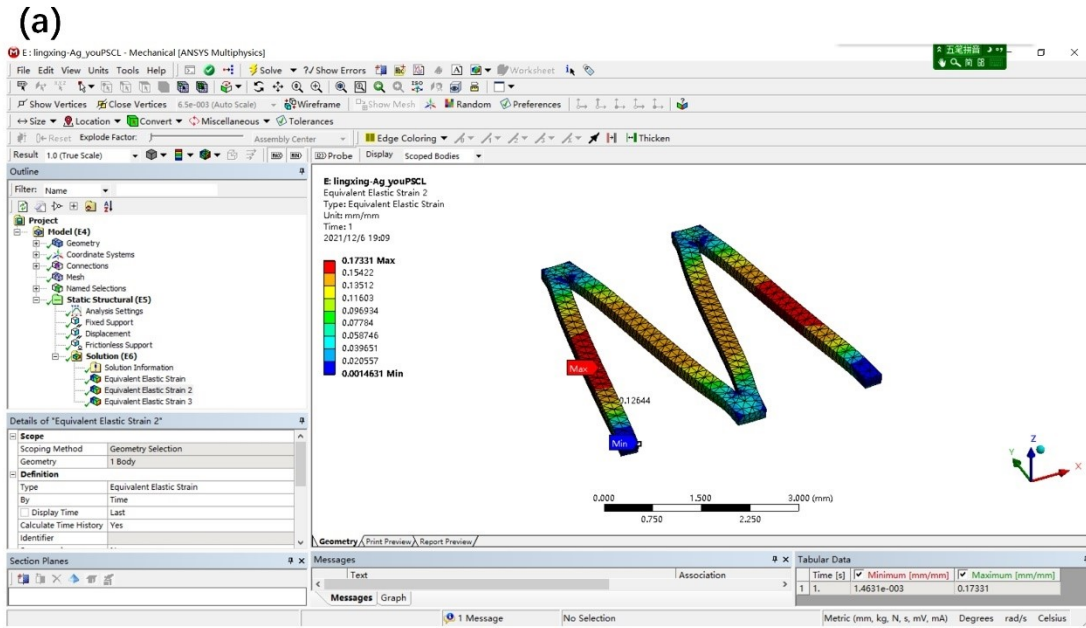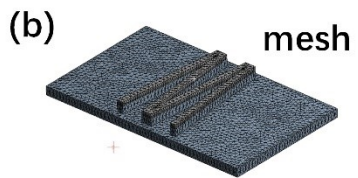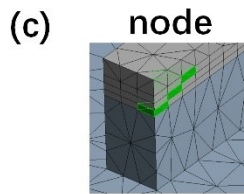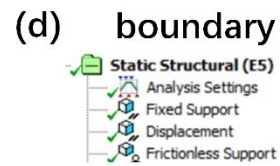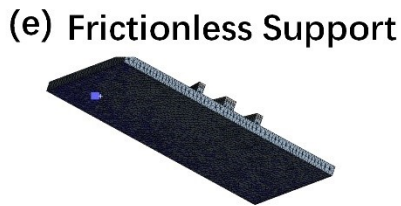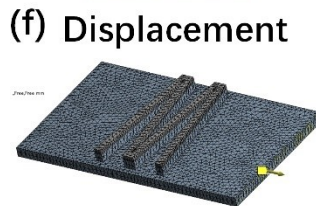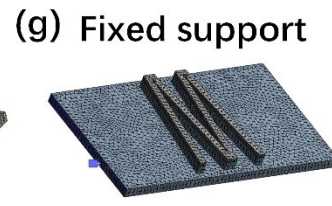

Fig.S8. Details of ANSYS simulation.

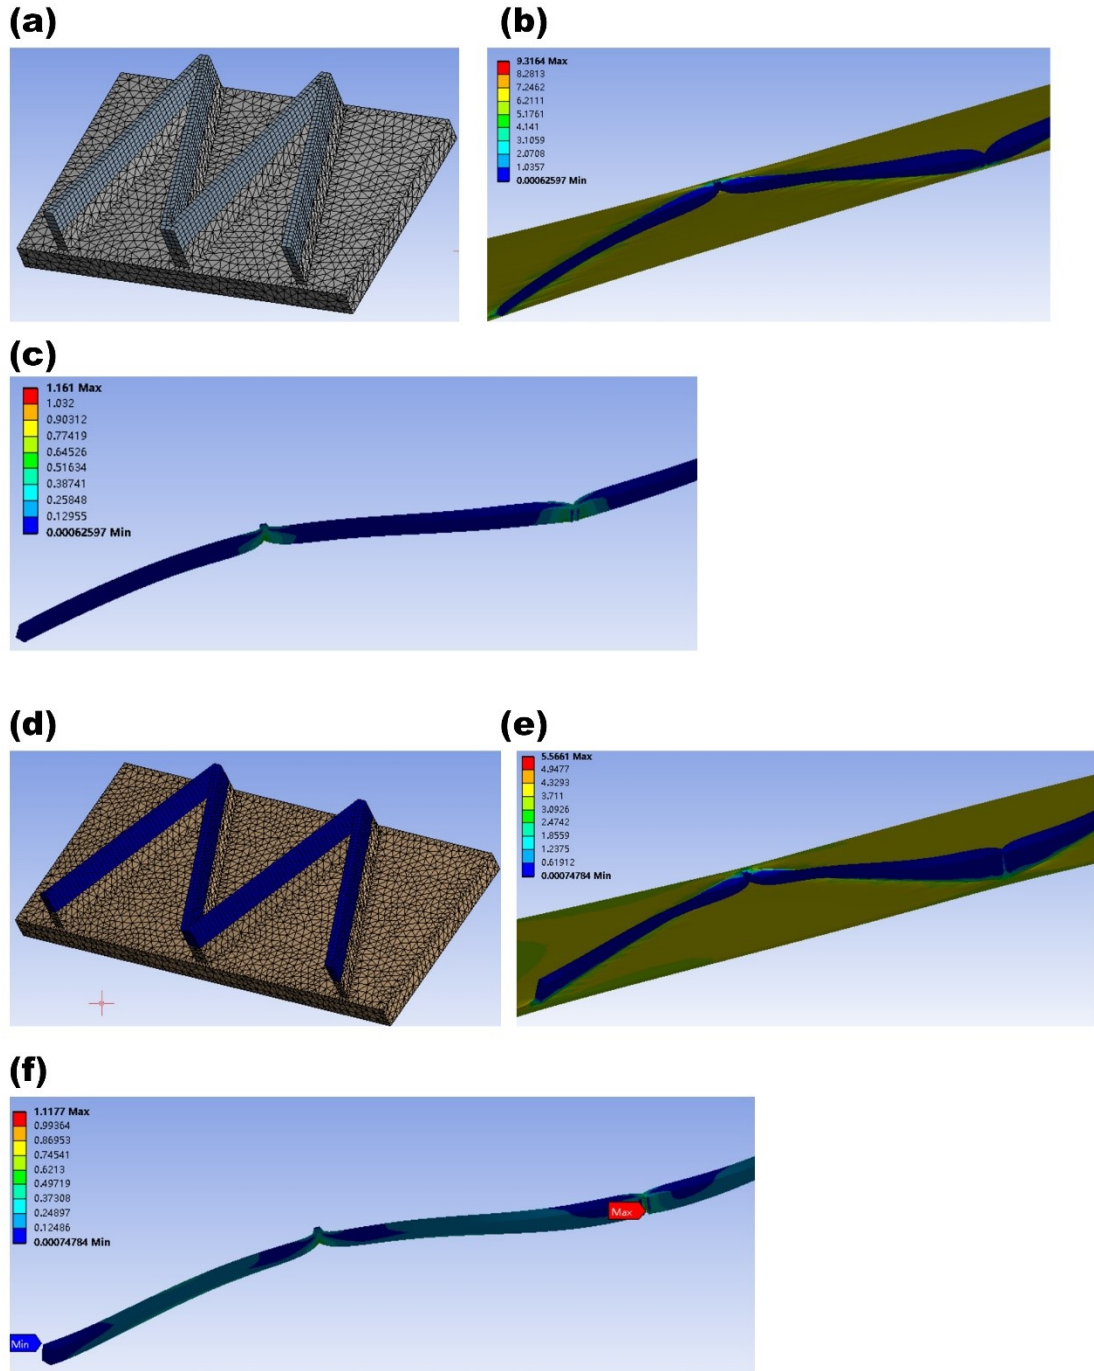

**Figure.S9** ANSYS simulation of fold-line patterns. (a) The three-dimensional model with an included angle of 32° and the simulation results of the whole (b) and nanocomposites (c). (d) The 3D model with an included angle of 48° degrees and the simulation results of the whole (e) and nanocomposites (f).



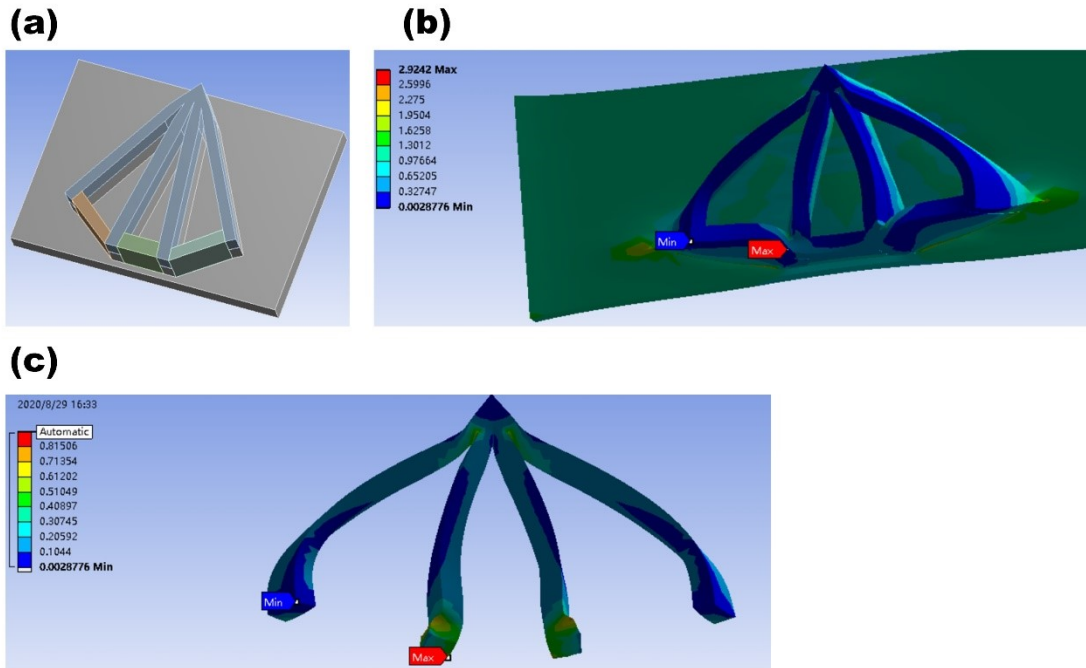

**Figure.S10** ANSYS simulation of ginkgo-like patterns. (a) The three-dimensional model and the simulation results of the whole (b) and nanocomposites (c).



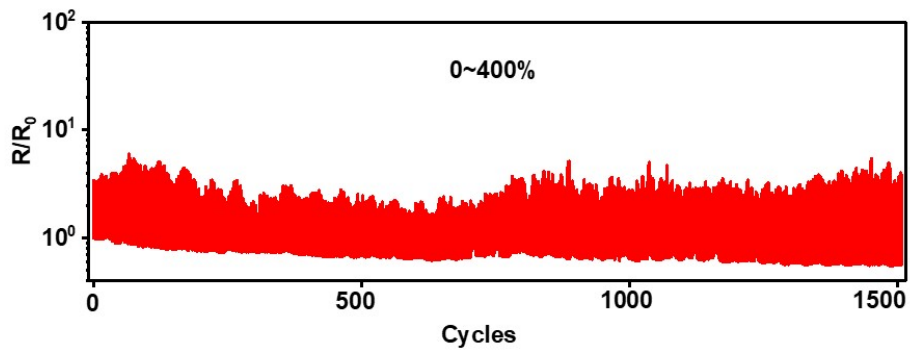

Fig.S11. 1500 stretching cycles of 0~400% strain.

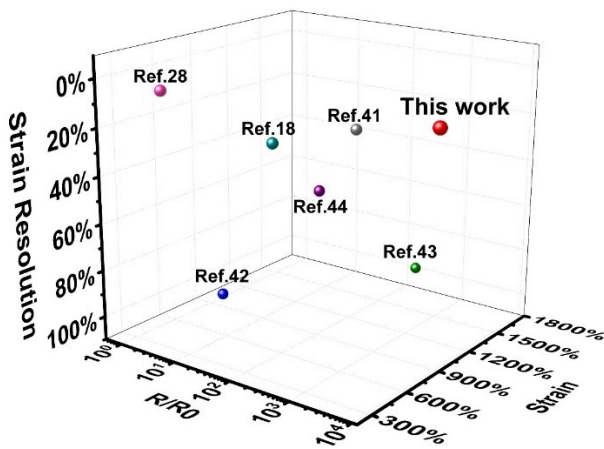

Figure.S12 A summary of the maximum detection strain, maximum resistance change, and strain resolution of seven high-performance strain sensors.
